# Supplementary material
Source: MDPI journal article supplement (https://www.mdpi.com/2071-1050/15/3/2069)
Supplement: s1 [file s1]

supplement:

# QUESTIONARIO LIGHTING

|            |  |
|------------|--|
| Protocollo |  |
| Condizione |  |
| Soggetto   |  |
| Data       |  |

## Come valuti l'ILLUMINAZIONE DEL PARCO:

|                    |           |           |           |          |          |          |          |                        |
|--------------------|-----------|-----------|-----------|----------|----------|----------|----------|------------------------|
| <b>FIOCA</b>       | <b>-3</b> | <b>-2</b> | <b>-1</b> | <b>0</b> | <b>1</b> | <b>2</b> | <b>3</b> | <b>BRILLANTE</b>       |
| <b>FORTE</b>       | <b>-3</b> | <b>-2</b> | <b>-1</b> | <b>0</b> | <b>1</b> | <b>2</b> | <b>3</b> | <b>DEBOLE</b>          |
| <b>SCURA</b>       | <b>-3</b> | <b>-2</b> | <b>-1</b> | <b>0</b> | <b>1</b> | <b>2</b> | <b>3</b> | <b>LUMINOSA</b>        |
| <b>UNIFORME</b>    | <b>-3</b> | <b>-2</b> | <b>-1</b> | <b>0</b> | <b>1</b> | <b>2</b> | <b>3</b> | <b>CONCENTRATA</b>     |
| <b>CHIARA</b>      | <b>-3</b> | <b>-2</b> | <b>-1</b> | <b>0</b> | <b>1</b> | <b>2</b> | <b>3</b> | <b>CUPA</b>            |
| <b>INTENSA</b>     | <b>-3</b> | <b>-2</b> | <b>-1</b> | <b>0</b> | <b>1</b> | <b>2</b> | <b>3</b> | <b>SOFFUSA</b>         |
| <b>CALDA</b>       | <b>-3</b> | <b>-2</b> | <b>-1</b> | <b>0</b> | <b>1</b> | <b>2</b> | <b>3</b> | <b>FREDDA</b>          |
| <b>NATURALE</b>    | <b>-3</b> | <b>-2</b> | <b>-1</b> | <b>0</b> | <b>1</b> | <b>2</b> | <b>3</b> | <b>INNATURALE</b>      |
| <b>ABBAGLIANTE</b> | <b>-3</b> | <b>-2</b> | <b>-1</b> | <b>0</b> | <b>1</b> | <b>2</b> | <b>3</b> | <b>NON ABBAGLIANTE</b> |
| <b>MORBIDA</b>     | <b>-3</b> | <b>-2</b> | <b>-1</b> | <b>0</b> | <b>1</b> | <b>2</b> | <b>3</b> | <b>NETTA</b>           |
